# Supplementary material for: High-performance thermoelectric materials based on ternary TiO2/CNT/PANI composites
Source: Royal Society of Chemistry journal article supplement (doi:10.1039/c7cp07896j), 2018-01-01
Supplement: c7cp07896j1.pdf [file c7cp07896j1.pdf]

## High-Performance Thermoelectric Materials Based on the Ternary TiO<sub>2</sub>/CNT/PANI Composites

Fuat Erden, Hui Li, Xizu Wang, FuKe Wang, Chaobin He

### Supporting Information

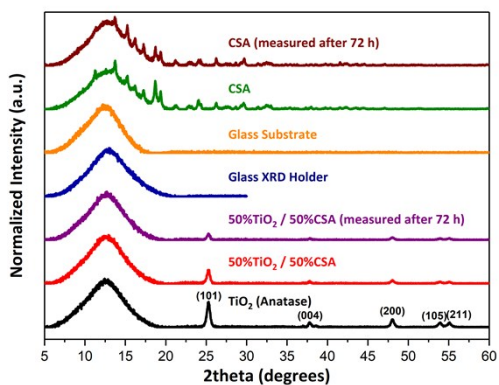

Figure S1. X-Ray Diffraction Patterns of the other necessary samples.

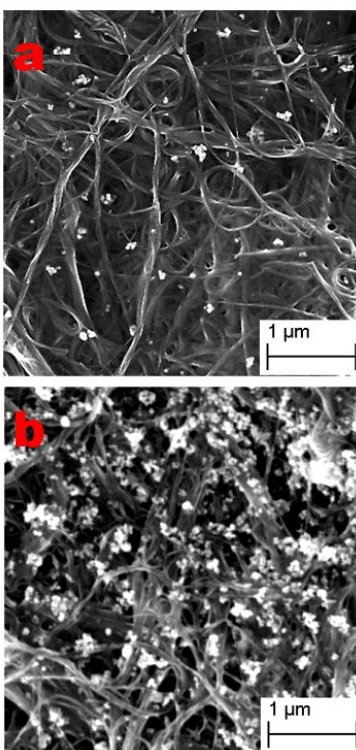

Figure S2. SEM micrographs of the 70%a-CNT-50%PANI composites with different TiO<sub>2</sub> content: 10% (a), and 70% (b) – illustrating the disruption of 3D conducting CNT network at high TiO<sub>2</sub> content composites.

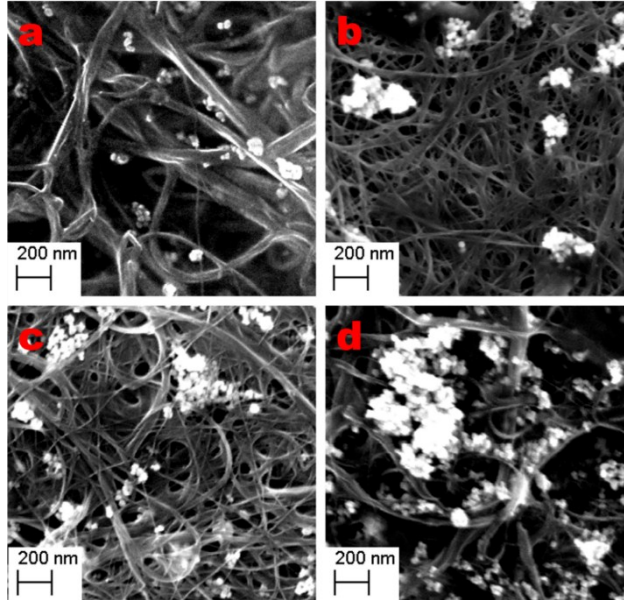

**Figure S3.** SEM micrographs of the 50%a-CNT/50%PANI composites (a, and c) and 70%a-CNT/30%PANI composites (b, and d) with different TiO<sub>2</sub> content: 30% (a, and b), and 70% (c, and d) – illustrating the disruption of 3D conducting CNT network at high TiO<sub>2</sub> content composites.

**Table S1. Comparison of the room temperature TE properties of the organic based ternary composites**

| Materials                      | Conductivity (S/cm) | Thermopower ( $\mu\text{V/K}$ ) | PF ( $\mu\text{W/mK}^2$ ) | Ref.      |
|--------------------------------|---------------------|---------------------------------|---------------------------|-----------|
| PANI/SWNT/Te                   | 345                 | 54                              | 101                       | [1]       |
| PPy/GP/PANI                    | 500                 | 29                              | 42                        | [2]       |
| rGO/CdS/PANI                   | $2.9 \times 10^3$   | 18                              | 92                        | [3]       |
| PEDOT/rGO/SWNT                 | 208.4               | 20.9                            | 9.1                       | [4]       |
| rGO/PEDOT/Te                   | 35                  | 202                             | 143                       | [5]       |
| Te/Cu <sub>1.75</sub> Te/PEDOT | 1.73                | 220                             | 84                        | [6]       |
| PVAc/Graphene/TiO <sub>2</sub> | 26                  | -42                             | 47                        | [7]       |
| TiO <sub>2</sub> /a-CNT/PANI   | 2183                | 22.9                            | 114.5                     | This work |

## References

1. Wang, L., et al., *Engineering carrier scattering at the interfaces in polyaniline based nanocomposites for high thermoelectric performances*. Mater. Chem. Front., 2017. **1**(4): p. 741-748.
2. Wang, Y., et al., *Polypyrrole/Graphene/Polyaniline Ternary Nanocomposite with High Thermoelectric Power Factor*. ACS Appl Mater Interfaces, 2017. **9**(23): p. 20124-20131.
3. More, P.V., et al., *Band engineered p-type RGO–CdS–PANI ternary nanocomposites for thermoelectric applications*. Sustainable Energy Fuels, 2017. **1**(8): p. 1766-1773.
4. Li, X., et al., *Poly(3,4-ethylenedioxythiophene)/graphene/carbon nanotube ternary composites with improved thermoelectric performance*. Organic Electronics, 2016. **38**: p. 200-204.
5. Choi, J., et al., *High-Performance Thermoelectric Paper Based on Double Carrier-Filtering Processes at Nanowire Heterojunctions*. Advanced Energy Materials, 2016. **6**(9).

6. Zaia, E.W., et al., *Carrier Scattering at Alloy Nanointerfaces Enhances Power Factor in PEDOT:PSS Hybrid Thermoelectrics*. Nano Lett, 2016. **16**(5): p. 3352-9.
7. Dey, A., et al., *Polymer based graphene/titanium dioxide nanocomposite (GTNC): an emerging and efficient thermoelectric material*. Dalton Transactions, 2015. **44**(44): p. 19248-19255.
